# Supplementary material for: Transcriptional Profiling of Monocytes Deficient in Nuclear Orphan Receptors NR4A2 and NR4A3 Reveals Distinct Signalling Roles Related to Antigen Presentation and Viral Response
Source: PubMed Central journal article supplement (PMC8267906; doi:10.3389/fimmu.2021.676644), 2021-06-25
Supplement: Presentation_1.pdf [file Presentation_1.pdf]

**Figure. S1**

**A.**

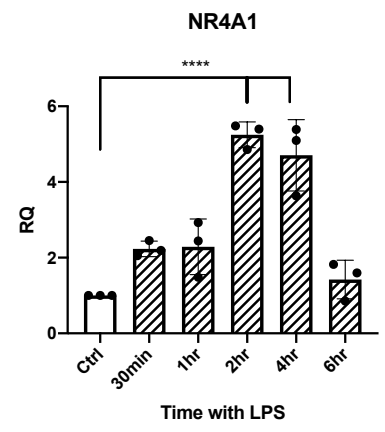

**B.**

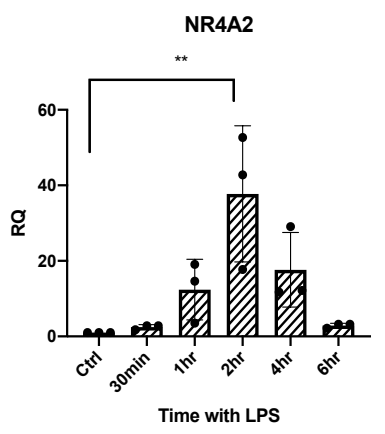

**C.**

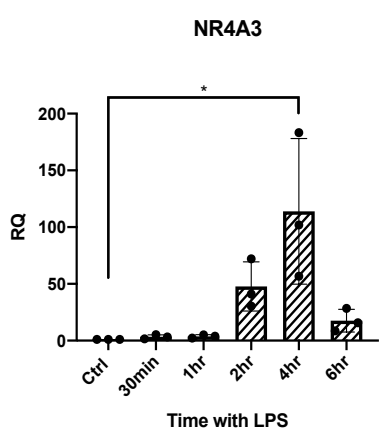

**D.**

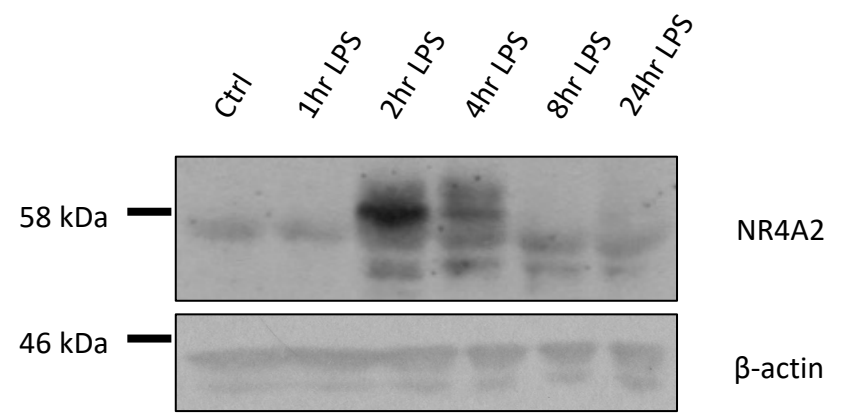

Figure. S2

A.

shNR4A2

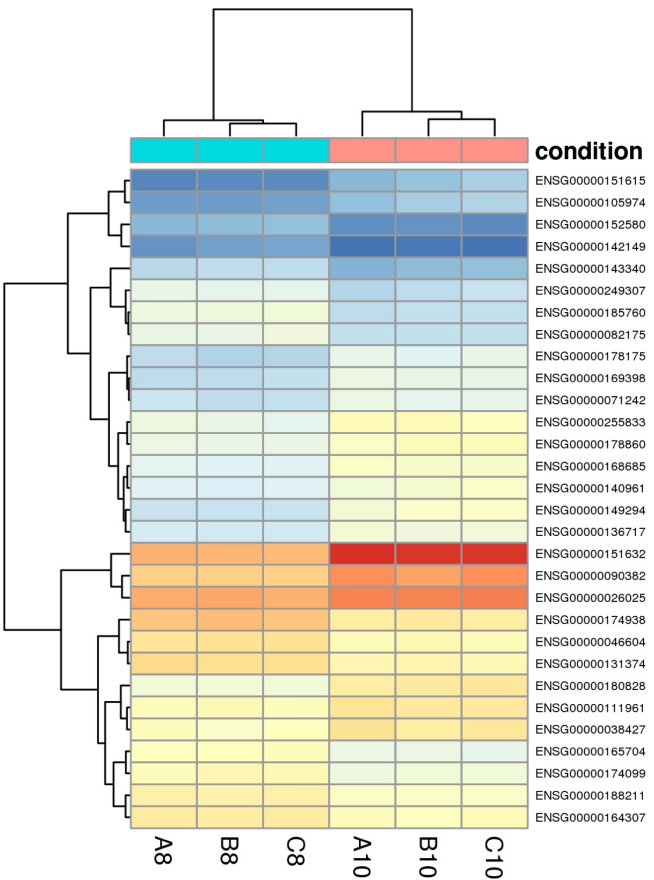

shNT-THP1 shNR4A2-THP1

B.

shNR4A3

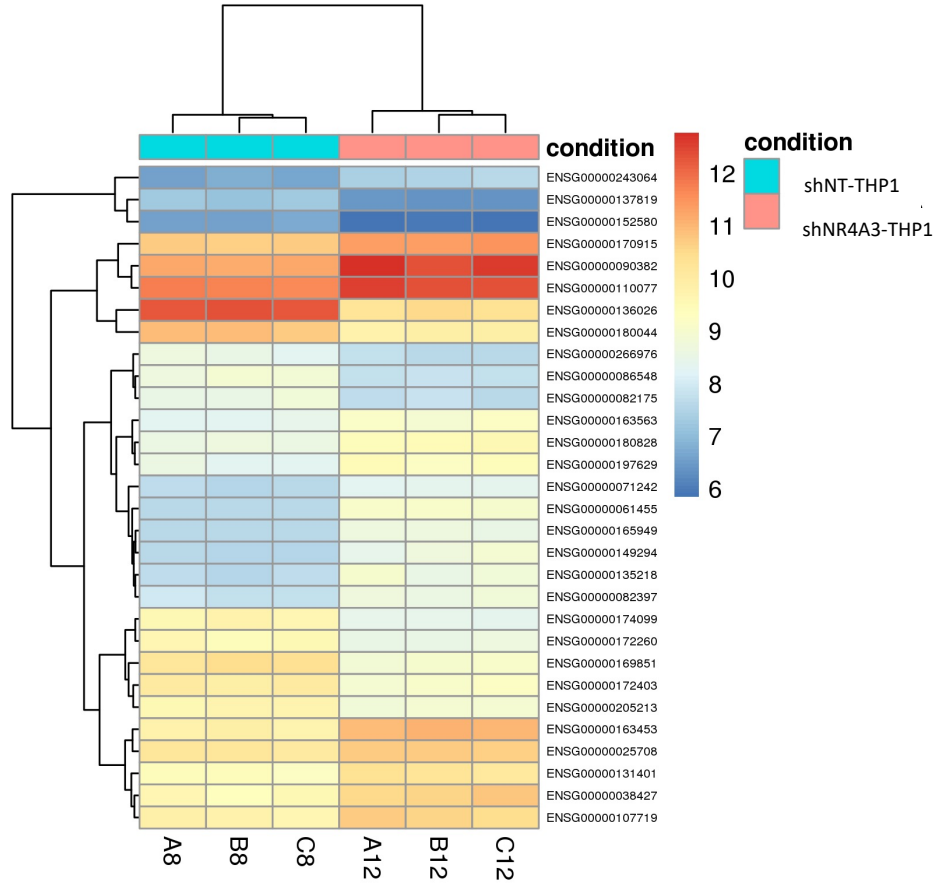

shNT-THP1 shNR4A3-THP1

Figure. S3

shNR4A2

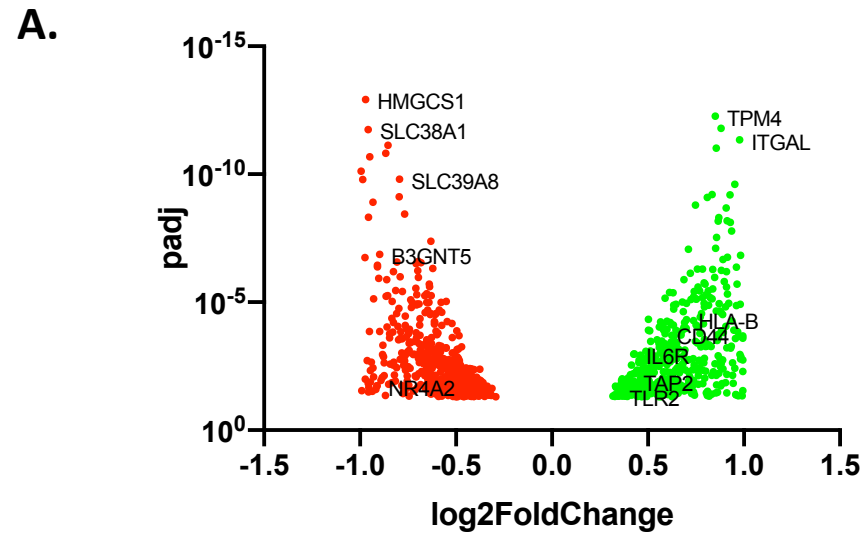

shNR4A3

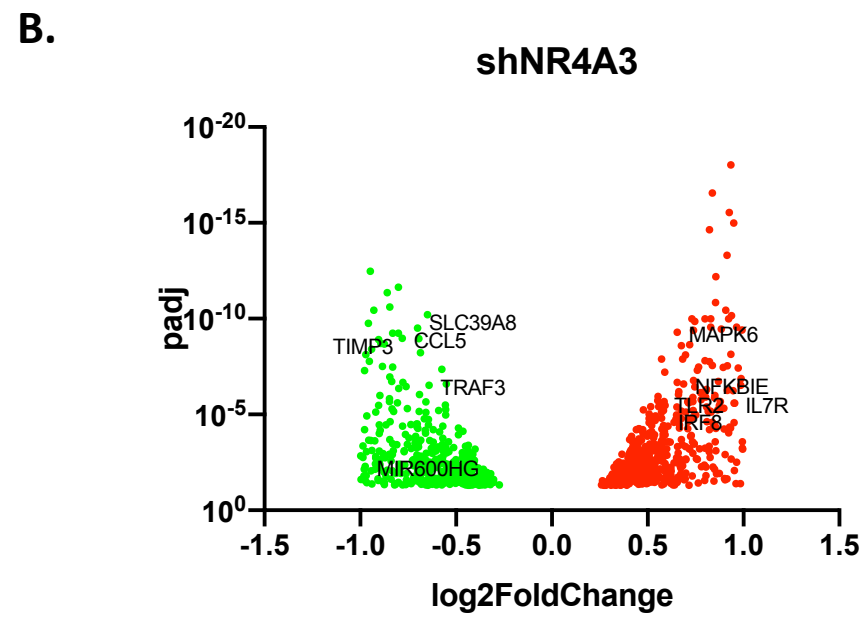

**Figure. S4**

**A.**

- 4. shNR4A2 only regulated genes in the presence of LPS (935)
- 5. shNR4A3 only regulated genes in the presence of LPS (791)
- 6. shNR4A2 & shNR4A3 regulated genes in presence of LPS (577)

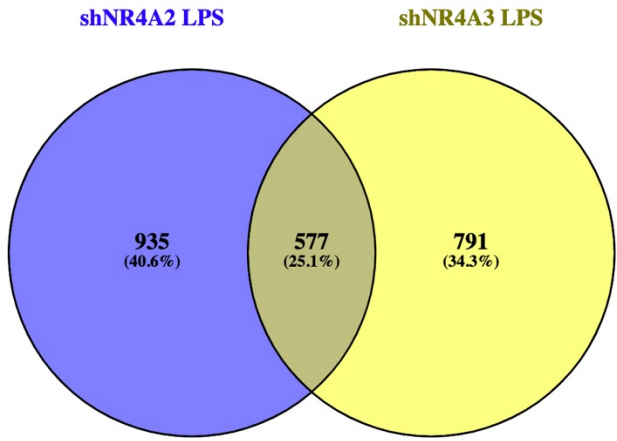

**B.**

|                | Cluster 4                                                                                                                                                                                                                                                                                                                                                         | Cluster 6                                                                                                                                                                                                                                                                           | Cluster 5                                                                                                                                                     |
|----------------|-------------------------------------------------------------------------------------------------------------------------------------------------------------------------------------------------------------------------------------------------------------------------------------------------------------------------------------------------------------------|-------------------------------------------------------------------------------------------------------------------------------------------------------------------------------------------------------------------------------------------------------------------------------------|---------------------------------------------------------------------------------------------------------------------------------------------------------------|
| <b>GO Term</b> | (i) Antigen processing and presentation of endogenous peptide antigen via MHC class I via ER pathway, TAP-independent (GO:0002486)<br>(ii) Antigen processing and presentation of endogenous peptide antigen via MHC class I via ER pathway (GO:0002484)<br>(iii) Antigen processing and presentation of endogenous peptide antigen via MHC class Ib (GO:0002476) | (i) T cell activation via T cell receptor contact with antigen bound to MHC molecule on antigen presenting cell (GO:0002291)<br>(ii) Regulation of guanyl-nucleotide exchange factor activity (GO:1905097)<br>(iii) Regulation of chemokine-mediated signaling pathway (GO:0070099) | (i) Positive regulation of monocyte aggregation (GO:1900625)<br>(ii) p38MAPK cascade (GO:0038066)<br>(iii) Cellular response to interferon-alpha (GO:0035457) |
| <b>Genes</b>   | (i) <i>HLA-C, HLA-E, HLA-B, HLA-F, HLA-A, HLA-G, HLA-H</i><br>(ii) <i>HLA-C, HLA-E, HLA-B, HLA-F, HLA-A, HLA-G, HLA-H</i><br>(iii) <i>HLA-E, HLA-F, HLA-G, HLA-H, TAP2</i>                                                                                                                                                                                        | (i) <i>ITGAL, FGL2, ICAM1</i><br>(ii) <i>GPSM1, MET, CCPG1, PBXIP1</i><br>(iii) <i>EDN1, ROBO1, PADI2, SH2B3</i>                                                                                                                                                                    | (i) <i>NR4A3, HAS2, AL133330</i><br>(ii) <i>ZFP36, ZFP36L1, LGALS9</i><br>(iii) <i>IFIT2, OAS1, IFIT3, AXL, GAS6PHYSIP</i>                                    |

**Figure. S5**

7. Genes that appear to be equally regulated by shNR4A2 and shNR4A3 in both the basal and stimulated state (276)

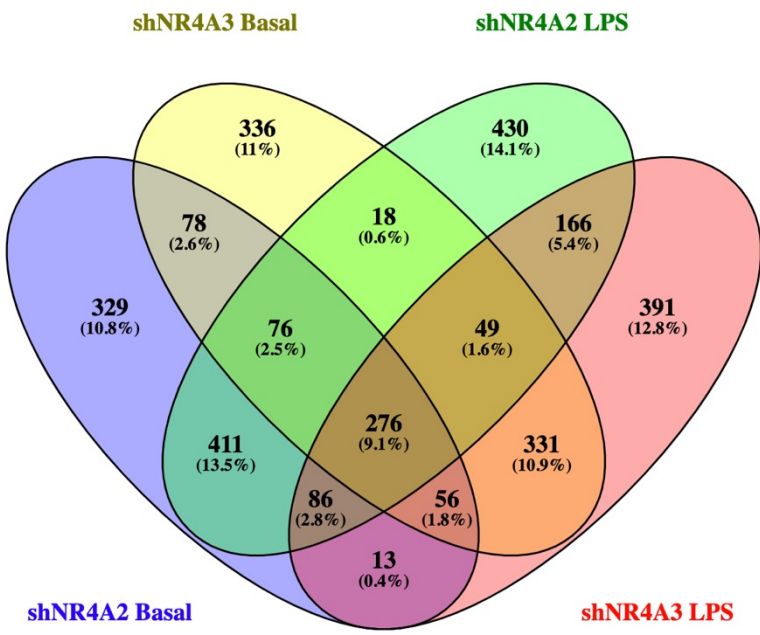

|         |                                                                                                                                                                                                                                                                                                        |
|---------|--------------------------------------------------------------------------------------------------------------------------------------------------------------------------------------------------------------------------------------------------------------------------------------------------------|
| GO Term | <ul style="list-style-type: none"> <li>(i) Negative regulation of chemokine-mediated signaling pathway (GO:0070100)</li> <li>(ii) Amyloid-beta clearance (GO:0097242)</li> <li>(iii) Endothelial cell migration (GO:0043542)</li> <li>(iv) I-kappaB kinase/NF-kappaB signaling (GO:0007249)</li> </ul> |
| Genes   | <ul style="list-style-type: none"> <li>(i) <i>ROBO1, PADI2, SH2B3</i></li> <li>(ii) <i>ITGB2, CD36, ABCA7, IGF1R</i></li> <li>(iii) <i>ITGB2, NRP1, DPP4, GPX1, LPXN, NRP1, ROBO1</i></li> <li>(iv) <i>TLR7, NLRC3, TIFAB, BCL3, TNIP2, IRAK1BP1</i></li> </ul>                                        |

## Fibroblast activation genes GO:0072537

Figure. S6

A.

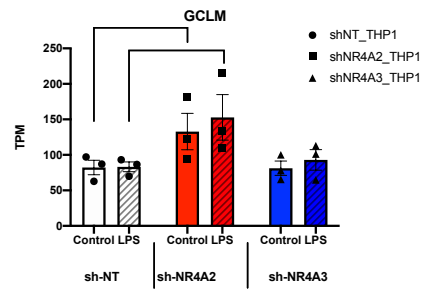

Padj

Padj

|                                                |                                       |
|------------------------------------------------|---------------------------------------|
| shNT Control vs shNR4A2 Control: <b>0.0044</b> | shNT Control vs shNR4A3 Control: 0.94 |
| shNT + LPS vs shNR4A2 + LPS: <b>0.0016</b>     | shNT + LPS vs shNR4A3 + LPS: 0.58     |

B.

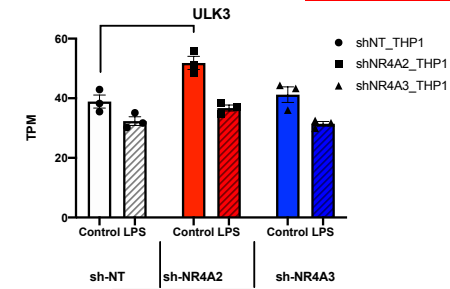

Padj

Padj

|                                               |                                       |
|-----------------------------------------------|---------------------------------------|
| shNT Control vs shNR4A2 Control: <b>0.040</b> | shNT Control vs shNR4A3 Control: 0.71 |
| shNT + LPS vs shNR4A2 + LPS: 0.27             | shNT + LPS vs shNR4A3 + LPS: 0.96     |

C.

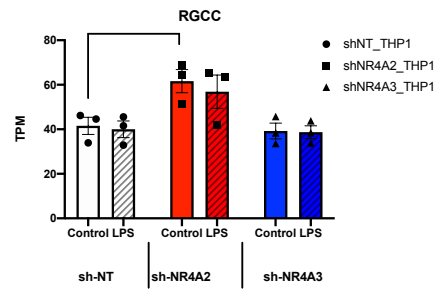

Padj

Padj

|                                               |                                       |
|-----------------------------------------------|---------------------------------------|
| shNT Control vs shNR4A2 Control: <b>0.031</b> | shNT Control vs shNR4A3 Control: 0.95 |
| shNT + LPS vs shNR4A2 + LPS: 0.052            | shNT + LPS vs shNR4A3 + LPS: 0.98     |

D.

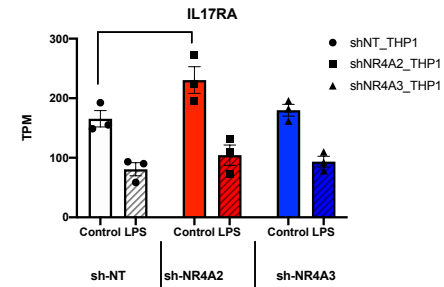

Padj

Padj

|                                               |                                       |
|-----------------------------------------------|---------------------------------------|
| shNT Control vs shNR4A2 Control: <b>0.018</b> | shNT Control vs shNR4A3 Control: 0.49 |
| shNT + LPS vs shNR4A2 + LPS: 0.20             | shNT + LPS vs shNR4A3 + LPS: 0.36     |

## Antigen processing and presentation of exogenous

Peptide antigen via MHC class I,  
TAP independent GO:0002480

Figure. S7

A.

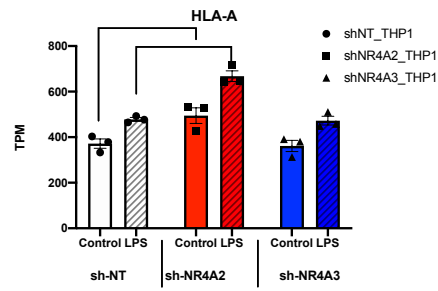

Padj

Padj

shNT Control vs shNR4A2 Control: **0.035**

shNT Control vs shNR4A3 Control: 0.99

shNT + LPS vs shNR4A2 + LPS: **0.00016**

shNT + LPS vs shNR4A3 + LPS: 0.87

B.

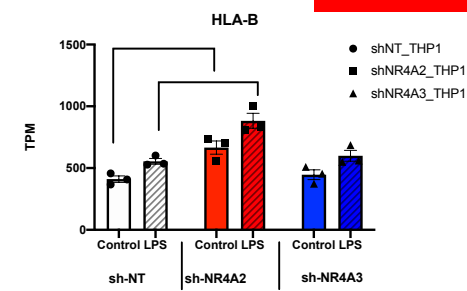

Padj

Padj

shNT Control vs shNR4A2 Control: **4.80 E-05**

shNT Control vs shNR4A3 Control: 0.57

shNT + LPS vs shNR4A2 + LPS: **9.93E-06**

shNT + LPS vs shNR4A3 + LPS: 0.50

C.

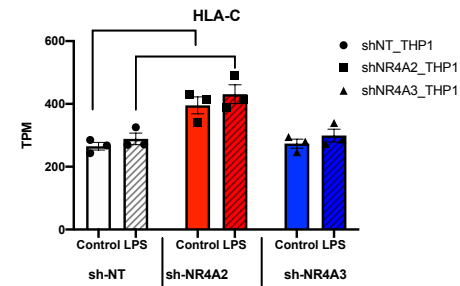

Padj

Padj

shNT Control vs shNR4A2 Control: **0.00061**

shNT Control vs shNR4A3 Control: 0.77

shNT + LPS vs shNR4A2 + LPS: **0.00046**

shNT + LPS vs shNR4A3 + LPS: 0.71

D.

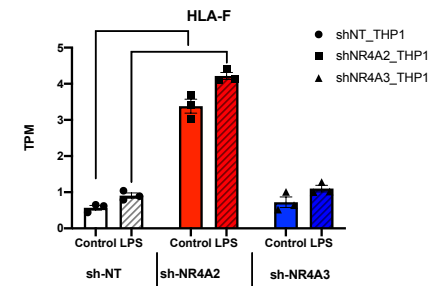

Padj

Padj

shNT Control vs shNR4A2 Control: **7.60E-11**

shNT Control vs shNR4A3 Control: 0.78

shNT + LPS vs shNR4A2 + LPS: **7.47 E-13**

shNT + LPS vs shNR4A3 + LPS: 0.71

E.

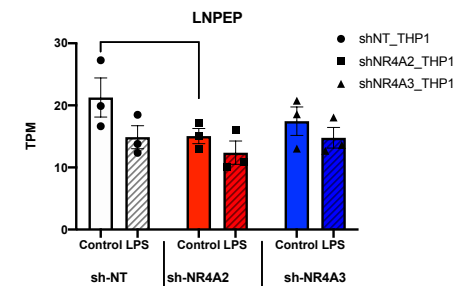

Padj

Padj

shNT Control vs shNR4A2 Control: **0.029**

shNT Control vs shNR4A3 Control: 0.47

shNT + LPS vs shNR4A2 + LPS: 0.55

shNT + LPS vs shNR4A3 + LPS: 0.91

# Antigen processing and presentation of endogenous peptide antigen GO:0002483

shNR4A2 selective – Cluster 1

**Figure. S8**

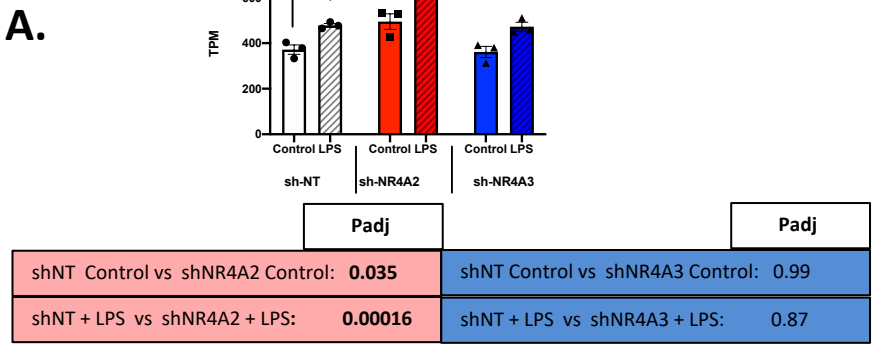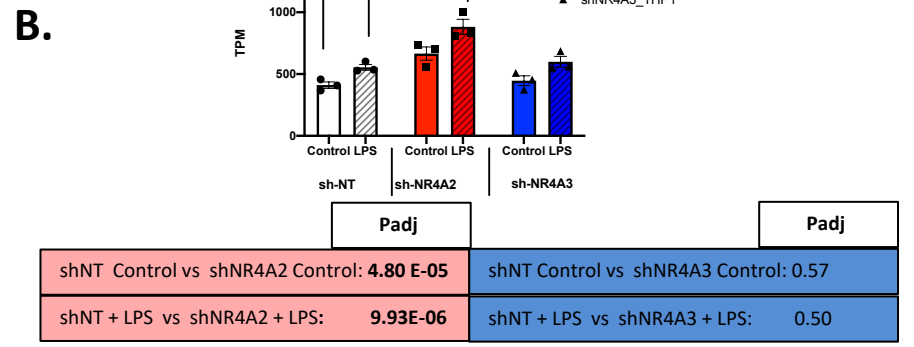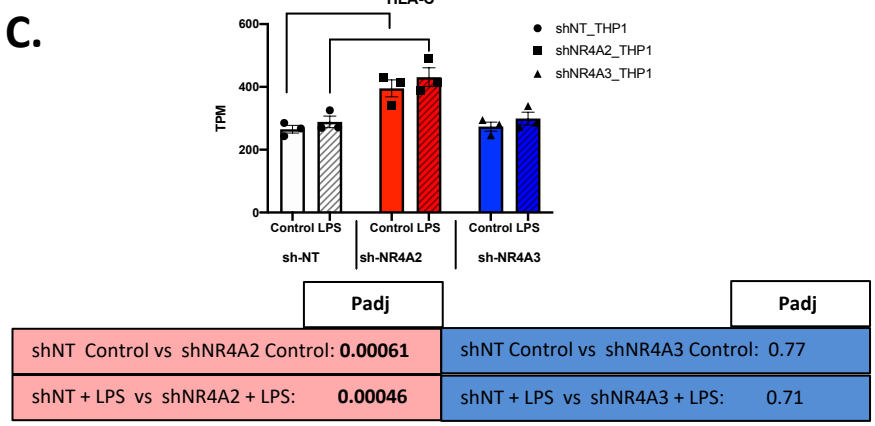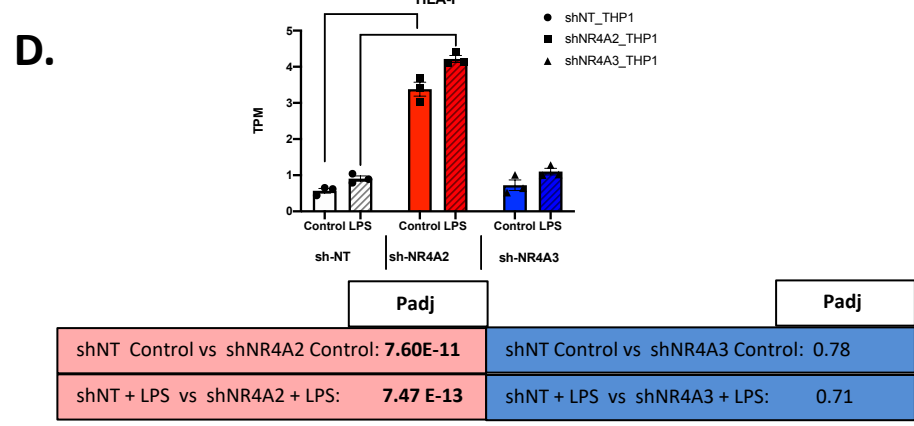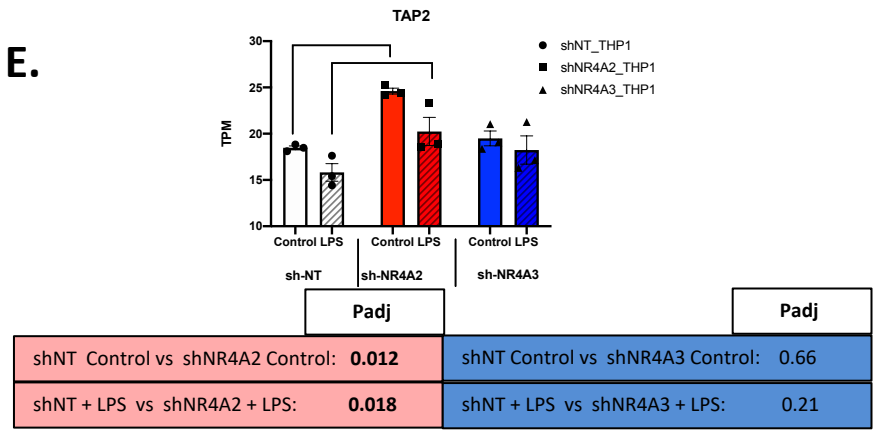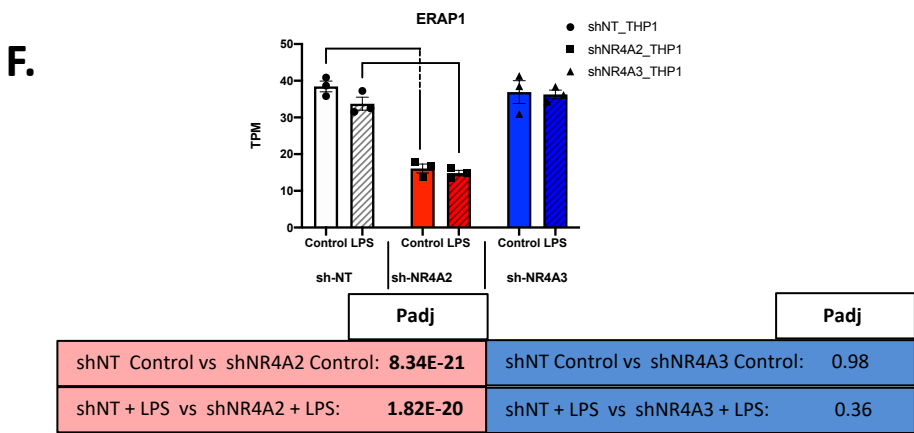



Figure. S9

Response to interferon alpha GO:035455

shNR4A3 selective – Cluster 2

A.

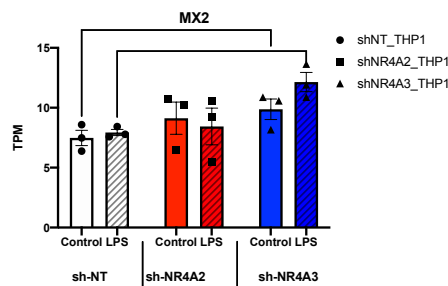

| Padj                                  | Padj                                          |
|---------------------------------------|-----------------------------------------------|
| shNT Control vs shNR4A2 Control: 0.39 | shNT Control vs shNR4A3 Control: <b>0.024</b> |
| shNT + LPS vs shNR4A2 + LPS: 0.77     | shNT + LPS vs shNR4A3 + LPS: <b>8.87E-06</b>  |

B.

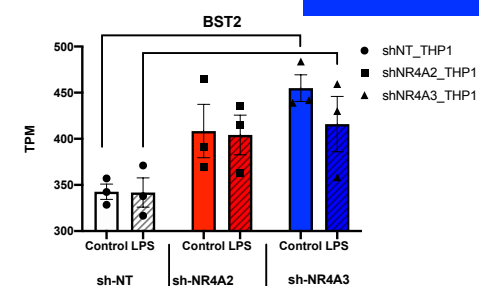

| Padj                                  | Padj                                            |
|---------------------------------------|-------------------------------------------------|
| shNT Control vs shNR4A2 Control: 0.25 | shNT Control vs shNR4A3 Control: <b>0.00019</b> |
| shNT + LPS vs shNR4A2 + LPS: 0.095    | shNT + LPS vs shNR4A3 + LPS: <b>0.045</b>       |

C.

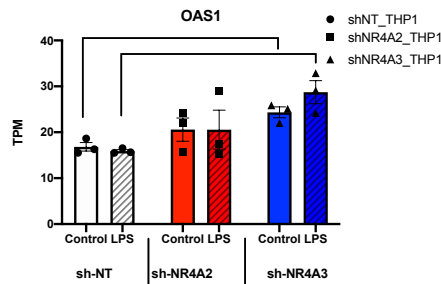

| Padj                                  | Padj                                            |
|---------------------------------------|-------------------------------------------------|
| shNT Control vs shNR4A2 Control: 0.31 | shNT Control vs shNR4A3 Control: <b>0.00011</b> |
| shNT + LPS vs shNR4A2 + LPS: 0.24     | shNT + LPS vs shNR4A3 + LPS: <b>1.64E-07</b>    |

D.

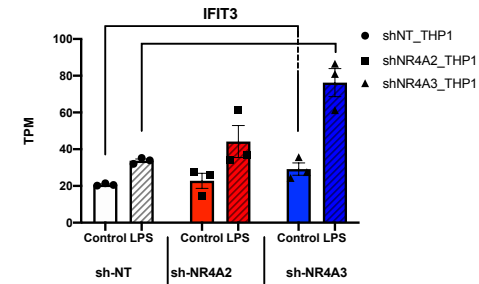

| Padj                                  | Padj                                           |
|---------------------------------------|------------------------------------------------|
| shNT Control vs shNR4A2 Control: 0.80 | shNT Control vs shNR4A3 Control: <b>0.0083</b> |
| shNT + LPS vs shNR4A2 + LPS: 0.20     | shNT + LPS vs shNR4A3 + LPS: <b>6.84E-12</b>   |

E.

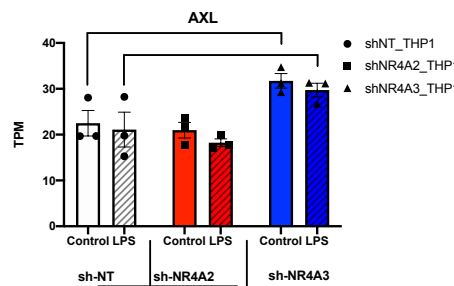

| Padj                                   | Padj                                           |
|----------------------------------------|------------------------------------------------|
| shNT Control vs shNR4A2 Control: 0.829 | shNT Control vs shNR4A3 Control: <b>0.0076</b> |
| shNT + LPS vs shNR4A2 + LPS: 0.747     | shNT + LPS vs shNR4A3 + LPS: <b>0.039</b>      |

F.

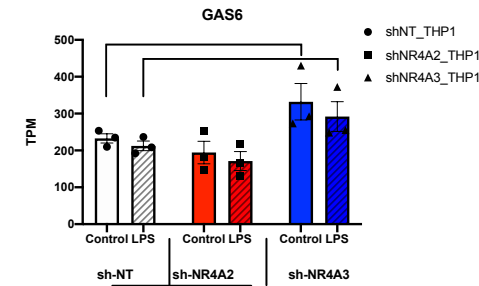

| Padj                                   | Padj                                           |
|----------------------------------------|------------------------------------------------|
| shNT Control vs shNR4A2 Control: 0.439 | shNT Control vs shNR4A3 Control: <b>0.0068</b> |
| shNT + LPS vs shNR4A2 + LPS: 0.494     | shNT + LPS vs shNR4A3 + LPS: <b>0.026</b>      |

Figure. S10

A.

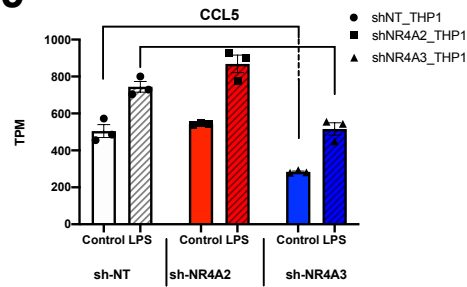

Padj

Padj

|                                       |                                                  |
|---------------------------------------|--------------------------------------------------|
| shNT Control vs shNR4A2 Control: 0.72 | shNT Control vs shNR4A3 Control: <b>1.06E-09</b> |
| shNT + LPS vs shNR4A2 + LPS: 0.20     | shNT + LPS vs shNR4A3 + LPS: <b>0.0101</b>       |

B.

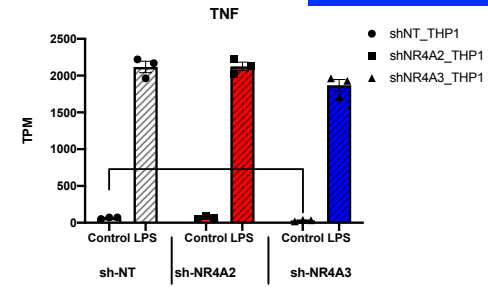

Padj

Padj

|                                       |                                                  |
|---------------------------------------|--------------------------------------------------|
| shNT Control vs shNR4A2 Control: 0.78 | shNT Control vs shNR4A3 Control: <b>3.45E-05</b> |
| shNT + LPS vs shNR4A2 + LPS: 0.81     | shNT + LPS vs shNR4A3 + LPS: 0.65                |

C.

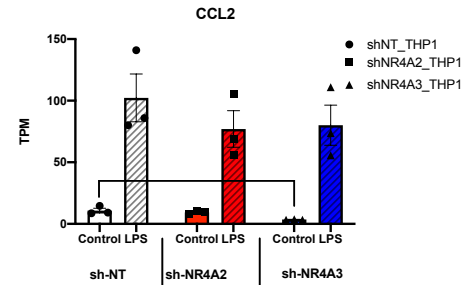

Padj

Padj

|                                       |                                                  |
|---------------------------------------|--------------------------------------------------|
| shNT Control vs shNR4A2 Control: 0.67 | shNT Control vs shNR4A3 Control: <b>4.07E-06</b> |
| shNT + LPS vs shNR4A2 + LPS: 0.51     | shNT + LPS vs shNR4A3 + LPS: 0.79                |

D.

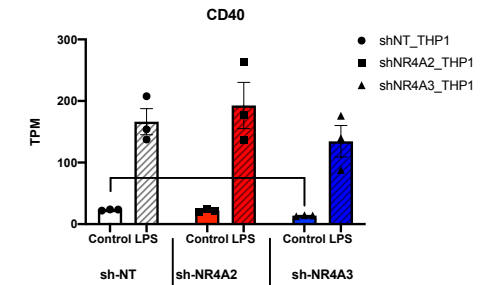

Padj

Padj

|                                       |                                                 |
|---------------------------------------|-------------------------------------------------|
| shNT Control vs shNR4A2 Control: 0.87 | shNT Control vs shNR4A3 Control: <b>0.00014</b> |
| shNT + LPS vs shNR4A2 + LPS: 0.58     | shNT + LPS vs shNR4A3 + LPS: 0.79               |

E.

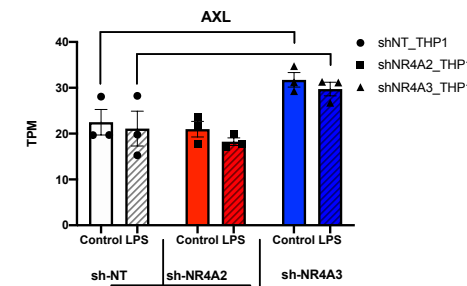

Padj

Padj

|                                       |                                                |
|---------------------------------------|------------------------------------------------|
| shNT Control vs shNR4A2 Control: 0.83 | shNT Control vs shNR4A3 Control: <b>0.0076</b> |
| shNT + LPS vs shNR4A2 + LPS: 0.75     | shNT + LPS vs shNR4A3 + LPS: <b>0.039</b>      |

F.

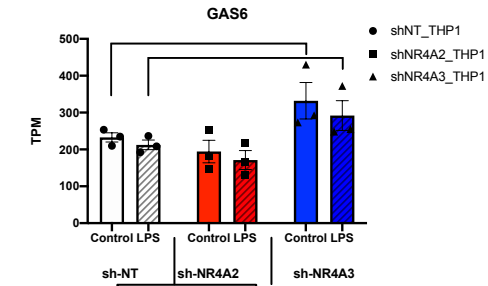

Padj

Padj

|                                       |                                                |
|---------------------------------------|------------------------------------------------|
| shNT Control vs shNR4A2 Control: 0.44 | shNT Control vs shNR4A3 Control: <b>0.0068</b> |
| shNT + LPS vs shNR4A2 + LPS: 0.49     | shNT + LPS vs shNR4A3 + LPS: <b>0.026</b>      |

# Protein Kinase B Signaling GO:0043491

## Figure. S10

### G.

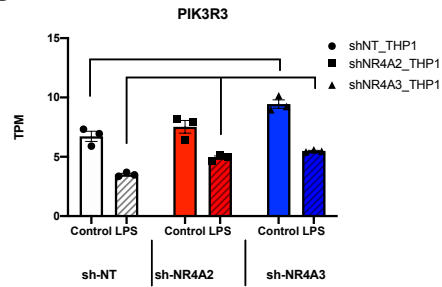

Padj

Padj

shNT Control vs shNR4A2 Control: 0.65

shNT Control vs shNR4A3 Control: **0.0035**

shNT + LPS vs shNR4A2 + LPS: **0.018**

shNT + LPS vs shNR4A3 + LPS: **0.00068**

### H.

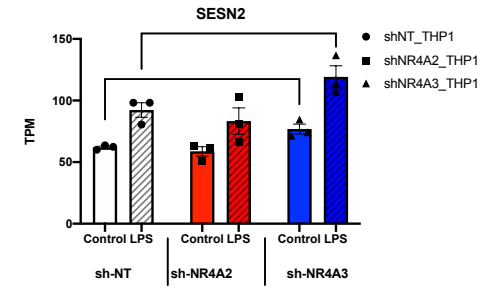

Padj

Padj

shNT Control vs shNR4A2 Control: 0.85

shNT Control vs shNR4A3 Control: **0.018**

shNT + LPS vs shNR4A2 + LPS: 0.86

shNT + LPS vs shNR4A3 + LPS: **0.025**

Figure. S11

A.

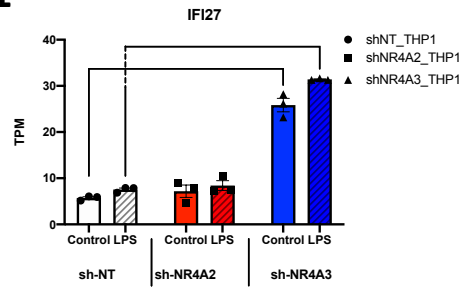

Padj

Padj

|                                       |                                                  |
|---------------------------------------|--------------------------------------------------|
| shNT Control vs shNR4A2 Control: 0.48 | shNT Control vs shNR4A3 Control: <b>1.47E-45</b> |
| shNT + LPS vs shNR4A2 + LPS: 0.63     | shNT + LPS vs shNR4A3 + LPS: <b>2.2E-48</b>      |

B.

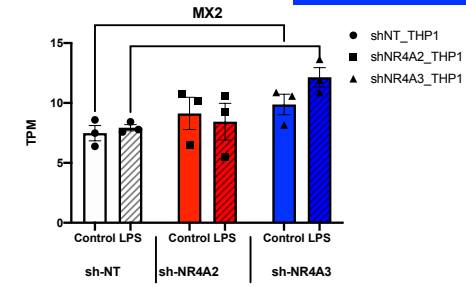

Padj

Padj

|                                       |                                               |
|---------------------------------------|-----------------------------------------------|
| shNT Control vs shNR4A2 Control: 0.39 | shNT Control vs shNR4A3 Control: <b>0.024</b> |
| shNT + LPS vs shNR4A2 + LPS: 0.77     | shNT + LPS vs shNR4A3 + LPS: <b>8.87E-06</b>  |

C.

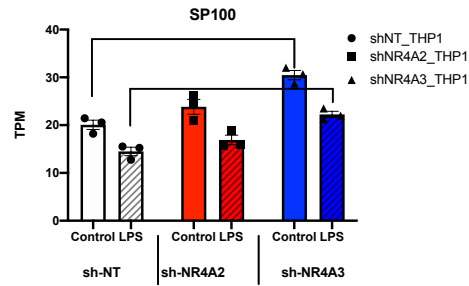

Padj

Padj

|                                       |                                                  |
|---------------------------------------|--------------------------------------------------|
| shNT Control vs shNR4A2 Control: 0.24 | shNT Control vs shNR4A3 Control: <b>2.08E-07</b> |
| shNT + LPS vs shNR4A2 + LPS: 0.13     | shNT + LPS vs shNR4A3 + LPS: <b>5.35E-08</b>     |

D.

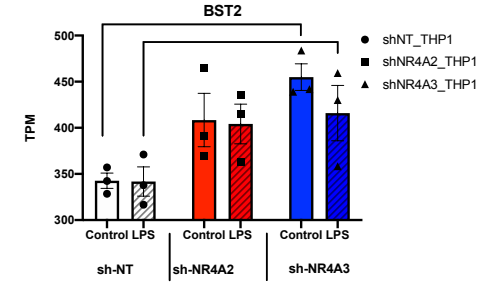

Padj

Padj

|                                       |                                                 |
|---------------------------------------|-------------------------------------------------|
| shNT Control vs shNR4A2 Control: 0.25 | shNT Control vs shNR4A3 Control: <b>0.00019</b> |
| shNT + LPS vs shNR4A2 + LPS: 0.095    | shNT + LPS vs shNR4A3 + LPS: <b>0.045</b>       |

E.

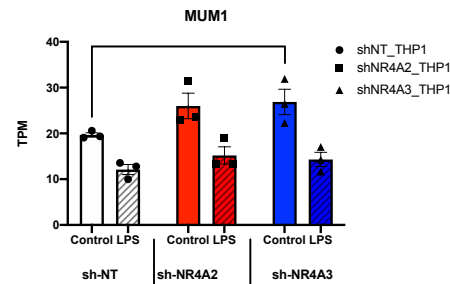

Padj

Padj

|                                        |                                                |
|----------------------------------------|------------------------------------------------|
| shNT Control vs shNR4A2 Control: 0.067 | shNT Control vs shNR4A3 Control: <b>0.0021</b> |
| shNT + LPS vs shNR4A2 + LPS: 0.12      | shNT + LPS vs shNR4A3 + LPS: 0.24              |

F.

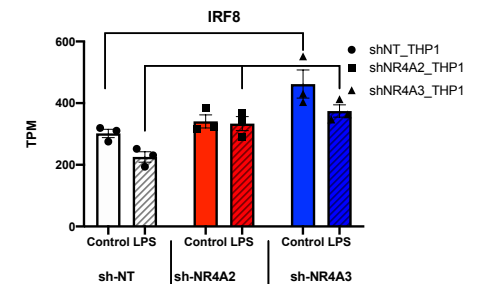

Padj

Padj

|                                             |                                                  |
|---------------------------------------------|--------------------------------------------------|
| shNT Control vs shNR4A2 Control: 0.51       | shNT Control vs shNR4A3 Control: <b>4.08E-06</b> |
| shNT + LPS vs shNR4A2 + LPS: <b>1.31E-5</b> | shNT + LPS vs shNR4A3 + LPS: <b>2.81E-11</b>     |

Figure. S11

G.

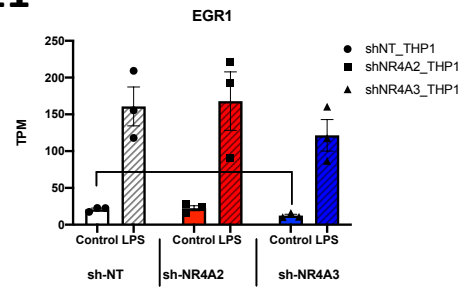

| Padj                             |      | Padj                             |               |
|----------------------------------|------|----------------------------------|---------------|
| shNT Control vs shNR4A2 Control: | 0.85 | shNT Control vs shNR4A3 Control: | <b>0.0030</b> |
| shNT + LPS vs shNR4A2 + LPS:     | 0.92 | shNT + LPS vs shNR4A3 + LPS:     | 0.35          |

H.

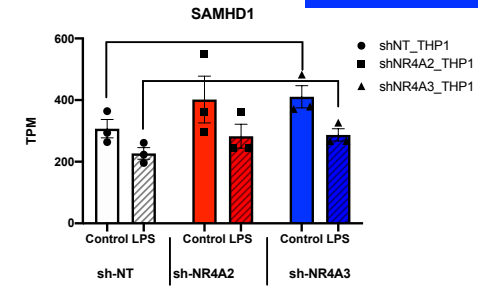

| Padj                             |      | Padj                             |              |
|----------------------------------|------|----------------------------------|--------------|
| shNT Control vs shNR4A2 Control: | 0.20 | shNT Control vs shNR4A3 Control: | <b>0.012</b> |
| shNT + LPS vs shNR4A2 + LPS:     | 0.20 | shNT + LPS vs shNR4A3 + LPS:     | <b>0.048</b> |

I.

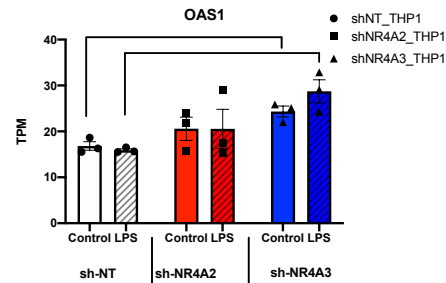

| Padj                             |      | Padj                             |                 |
|----------------------------------|------|----------------------------------|-----------------|
| shNT Control vs shNR4A2 Control: | 0.31 | shNT Control vs shNR4A3 Control: | <b>0.00011</b>  |
| shNT + LPS vs shNR4A2 + LPS:     | 0.24 | shNT + LPS vs shNR4A3 + LPS:     | <b>1.64E-07</b> |

J.

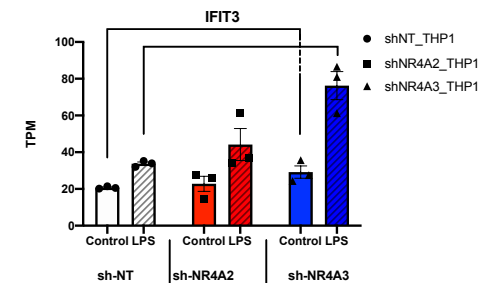

| Padj                             |      | Padj                             |                 |
|----------------------------------|------|----------------------------------|-----------------|
| shNT Control vs shNR4A2 Control: | 0.80 | shNT Control vs shNR4A3 Control: | <b>0.0083</b>   |
| shNT + LPS vs shNR4A2 + LPS:     | 0.20 | shNT + LPS vs shNR4A3 + LPS:     | <b>6.84E-12</b> |

K.

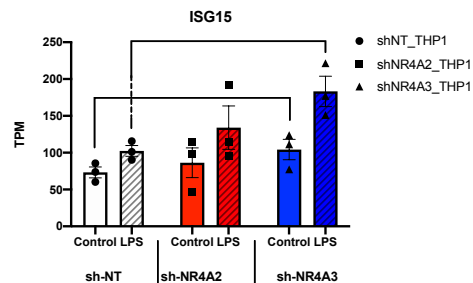

| Padj                             |      | Padj                             |                 |
|----------------------------------|------|----------------------------------|-----------------|
| shNT Control vs shNR4A2 Control: | 0.82 | shNT Control vs shNR4A3 Control: | <b>0.016</b>    |
| shNT + LPS vs shNR4A2 + LPS:     | 0.25 | shNT + LPS vs shNR4A3 + LPS:     | <b>7.41E-06</b> |

L.

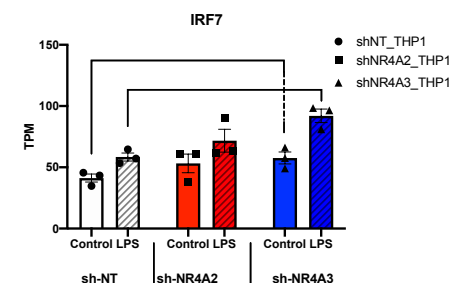

| Padj                             |      | Padj                             |                |
|----------------------------------|------|----------------------------------|----------------|
| shNT Control vs shNR4A2 Control: | 0.23 | shNT Control vs shNR4A3 Control: | <b>0.0042</b>  |
| shNT + LPS vs shNR4A2 + LPS:     | 0.24 | shNT + LPS vs shNR4A3 + LPS:     | <b>3.4E-05</b> |

## Type 1 interferon signaling pathway GO:0060337

Figure. S11

M.

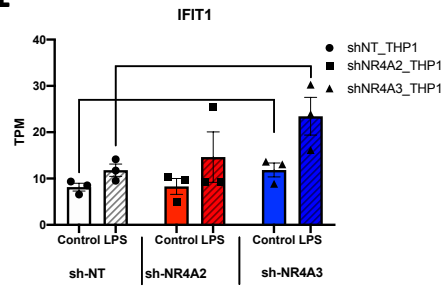

Padj

Padj

shNT Control vs shNR4A2 Control: 0.97

shNT Control vs shNR4A3 Control: **0.025**

shNT + LPS vs shNR4A2 + LPS: 0.77

shNT + LPS vs shNR4A3 + LPS: **0.00011**

N.

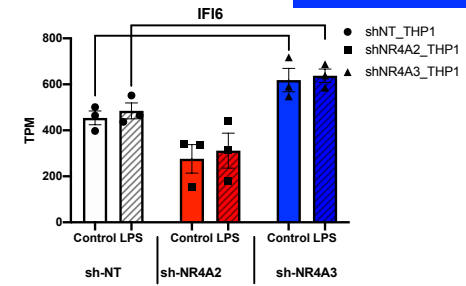

Padj

Padj

shNT Control vs shNR4A2 Control: 0.26

shNT Control vs shNR4A3 Control: **0.0086**

shNT + LPS vs shNR4A2 + LPS: 0.12

shNT + LPS vs shNR4A3 + LPS: **0.013**

Figure. S12

A.

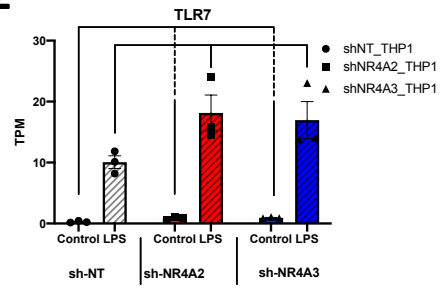

Padj

Padj

|                                               |                                               |
|-----------------------------------------------|-----------------------------------------------|
| shNT Control vs shNR4A2 Control: <b>0.042</b> | shNT Control vs shNR4A3 Control: <b>0.013</b> |
| shNT + LPS vs shNR4A2 + LPS: <b>0.0011</b>    | shNT + LPS vs shNR4A3 + LPS: <b>0.0034</b>    |

B.

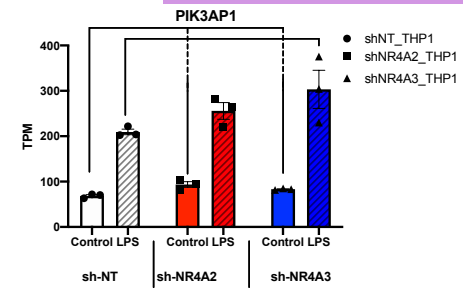

Padj

Padj

|                                                |                                               |
|------------------------------------------------|-----------------------------------------------|
| shNT Control vs shNR4A2 Control: <b>0.0047</b> | shNT Control vs shNR4A3 Control: <b>0.011</b> |
| shNT + LPS vs shNR4A2 + LPS: 0.12              | shNT + LPS vs shNR4A3 + LPS: <b>0.0094</b>    |

C.

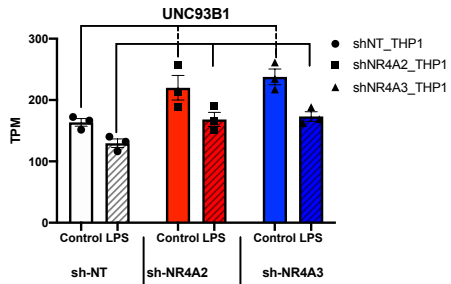

Padj

Padj

|                                               |                                                  |
|-----------------------------------------------|--------------------------------------------------|
| shNT Control vs shNR4A2 Control: <b>0.035</b> | shNT Control vs shNR4A3 Control: <b>6.20E-06</b> |
| shNT + LPS vs shNR4A2 + LPS: <b>0.0041</b>    | shNT + LPS vs shNR4A3 + LPS: <b>0.00012</b>      |

A.

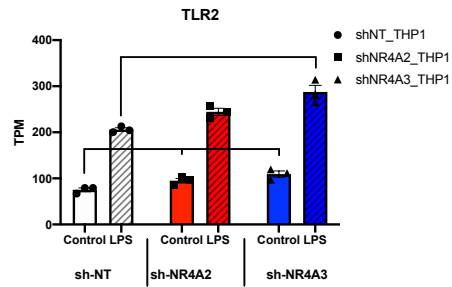

| Padj                             |              | Padj                             |                 |
|----------------------------------|--------------|----------------------------------|-----------------|
| shNT Control vs shNR4A2 Control: | <b>0.046</b> | shNT Control vs shNR4A3 Control: | <b>3.33E-06</b> |
| shNT + LPS vs shNR4A2 + LPS:     | 0.079        | shNT + LPS vs shNR4A3 + LPS:     | <b>8.74E-05</b> |

B.

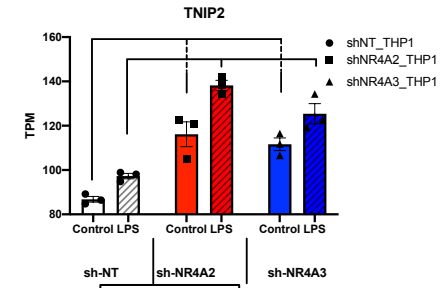

| Padj                             |                 | Padj                             |               |
|----------------------------------|-----------------|----------------------------------|---------------|
| shNT Control vs shNR4A2 Control: | <b>0.0123</b>   | shNT Control vs shNR4A3 Control: | <b>0.0029</b> |
| shNT + LPS vs shNR4A2 + LPS:     | <b>5.63E-05</b> | shNT + LPS vs shNR4A3 + LPS:     | <b>0.0020</b> |

C.

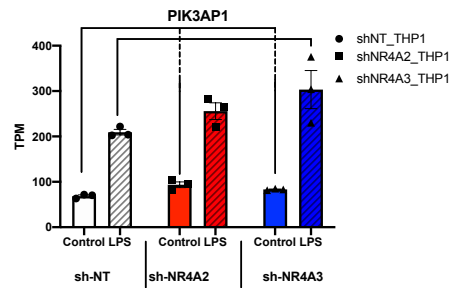

| Padj                             |               | Padj                             |               |
|----------------------------------|---------------|----------------------------------|---------------|
| shNT Control vs shNR4A2 Control: | <b>0.0047</b> | shNT Control vs shNR4A3 Control: | <b>0.011</b>  |
| shNT + LPS vs shNR4A2 + LPS:     | 0.12          | shNT + LPS vs shNR4A3 + LPS:     | <b>0.0094</b> |



A.

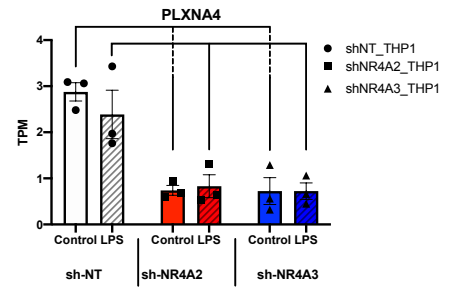

| Padj                             |                 | Padj                             |                 |
|----------------------------------|-----------------|----------------------------------|-----------------|
| shNT Control vs shNR4A2 Control: | <b>1.39E-16</b> | shNT Control vs shNR4A3 Control: | <b>0.0054</b>   |
| shNT + LPS vs shNR4A2 + LPS:     | <b>0.00015</b>  | shNT + LPS vs shNR4A3 + LPS:     | <b>6.77E-07</b> |

B.

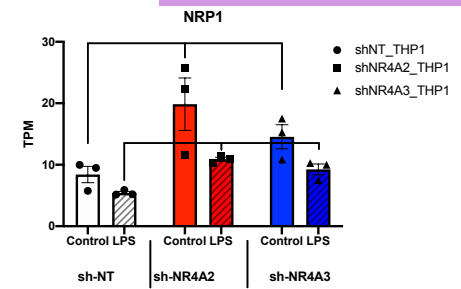

| Padj                             |                | Padj                             |                 |
|----------------------------------|----------------|----------------------------------|-----------------|
| shNT Control vs shNR4A2 Control: | <b>0.022</b>   | shNT Control vs shNR4A3 Control: | <b>0.00027</b>  |
| shNT + LPS vs shNR4A2 + LPS:     | <b>2.4E-12</b> | shNT + LPS vs shNR4A3 + LPS:     | <b>2.99E-05</b> |

C.

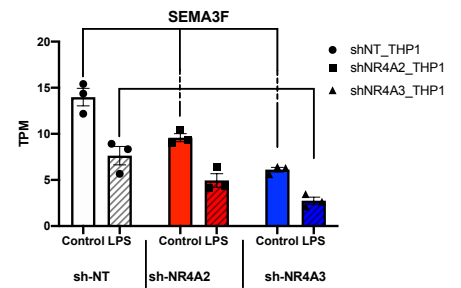

| Padj                             |              | Padj                             |                 |
|----------------------------------|--------------|----------------------------------|-----------------|
| shNT Control vs shNR4A2 Control: | <b>0.014</b> | shNT Control vs shNR4A3 Control: | <b>8.87E-10</b> |
| shNT + LPS vs shNR4A2 + LPS:     | 0.081        | shNT + LPS vs shNR4A3 + LPS:     | <b>6.74E-08</b> |
